# Supplementary material for: Semi-vacant Wells–Dawson anions. Synthesis of tri-tungsten-vacant derivatives and crystallographic studies of [αββα-(CuIIOH2)2(CuII)2(AsW15(OH2)3(OH)O52)2]12−
Source: Royal Society of Chemistry journal article supplement (doi:10.1039/b414831b), 2004-01-01
Supplement: b414831b.pdf [file b414831b.pdf]

*Electronic Supplementary Information for:*

**Semi-vacant Wells-Dawson anions. Synthesis of tri-tungsten-vacant derivatives and crystallographic studies of  $[\alpha\beta\alpha\text{-}(\text{Cu}^{\text{II}}\text{OH}_2)_2(\text{Cu}^{\text{II}})_2(\text{AsW}_{15}(\text{OH}_2)_3\text{-}(\text{OH})\text{O}_{52})_2]^{12-}$**

**Israel Martyr Mbomekalle,<sup>a</sup> Bineta Keita,<sup>a</sup> Louis Nadjo,<sup>\*a</sup> Kenneth I. Hardcastle,<sup>b</sup> Craig L. Hill,<sup>\*b</sup> and Travis M. Anderson<sup>b</sup>**

<sup>a</sup> *Laboratoire de Chimie Physique, UMR 8000, CNRS, Université Paris-Sud, 91405 Orsay Cedex, France*

*Email: nadjo@lcp.u-psud.fr*

<sup>b</sup> *Department of Chemistry, Emory University, Atlanta, Georgia, 30322*

*Email: chill@emory.edu*

**Table of Contents:**

**Figure S1.** Thermal ellipsoid plot of **2** (50% probability surfaces). The slight disorder (4%) in the  $\text{W}_3\text{O}_{13}$  "cap" units is shown (each cap is 96%  $\alpha$ -isomer and 4%  $\beta$ -isomer).

**Table S1.** W(VI)-based reduction potentials for **1**, **1Zn**, and **1Cu**.

Figure S1.

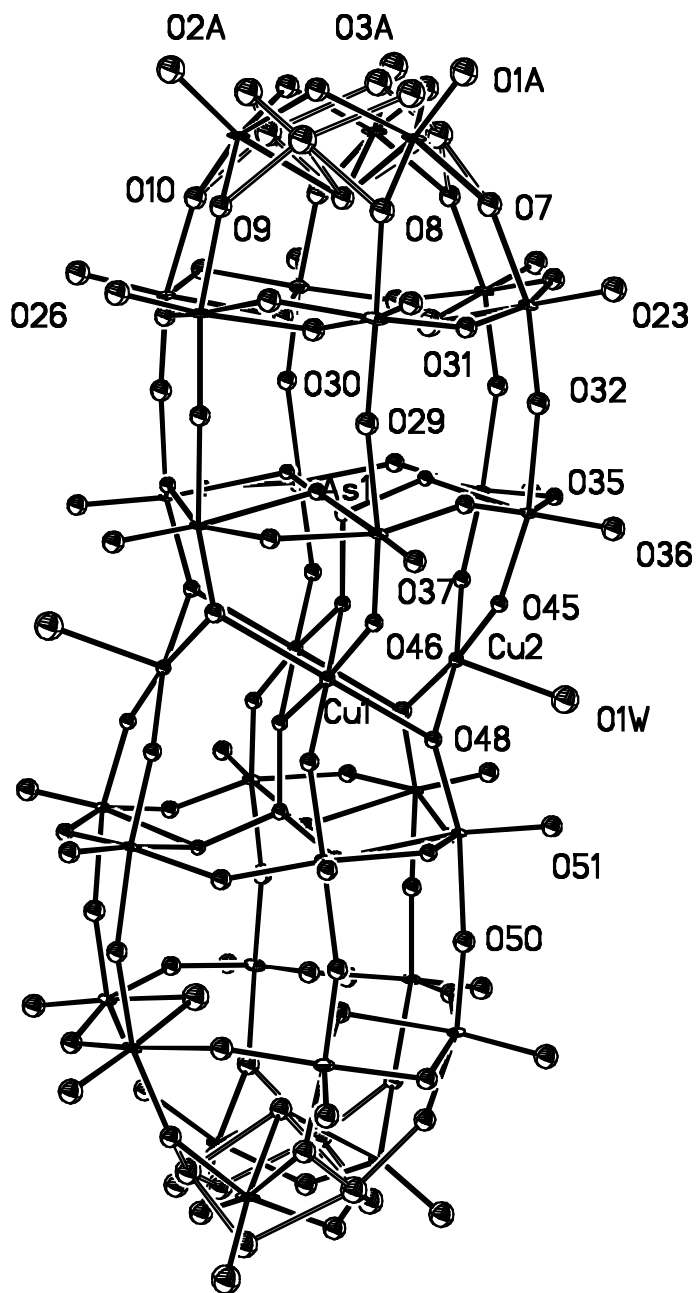

**Table S1.** W(VI)-based reduction potentials for **1**, **1Zn**, and **1Cu**.<sup>a</sup>

| complex    | $-E_{pc1}$ (V)     | $-E_{pc2}$ (V) | $-E_{pc3}$ (V) |
|------------|--------------------|----------------|----------------|
| <b>1</b>   | 0.528              | 0.644          | 0.876          |
| <b>1Zn</b> | 0.576              | 0.736          | 0.924          |
| <b>1Cu</b> | 0.588 <sup>b</sup> | 0.648          | 0.820          |

<sup>a</sup>Conditions: POM concentration:  $2 \times 10^{-4}$  M in 0.4 M  $\text{CH}_3\text{COOLi}/\text{CH}_3\text{COOH}$  (pH 5) solution; scan rate:  $10 \text{ mV s}^{-1}$ ; working electrode: glassy carbon; reference electrode: SCE; <sup>b</sup>This wave appears as a shoulder following a copper deposition wave with a cathodic peak potential  $E_{pc} = -0.320$  V and a characteristic desorptive oxidation peak potential located at  $E_{pa} = -0.10$  V.
